# Supplementary material for: Prioritizing Street Tree Planting Locations to Increase Benefits for All Citizens: Experience From Joliette, Canada
Source: Frontiers journal article supplement (doi:10.3389/fevo.2021.716611), 2021-09-23
Supplement: Data_Sheet_1.pdf [file Data_Sheet_1.pdf]

*Supplementary Material*

**Prioritizing Street Tree Planting Locations to Increase Benefits for All  
Citizens: Experience From Joliette, Canada**

**Rita Sousa-Silva\*, Elyssa Cameron, Alain Paquette**

*Centre for Forest Research, Université du Québec à Montréal, Montreal, QC, Canada*

**\*Correspondence:** Rita Sousa-Silva, e-mail: [silva.as.rita@gmail.com](mailto:silva.as.rita@gmail.com)

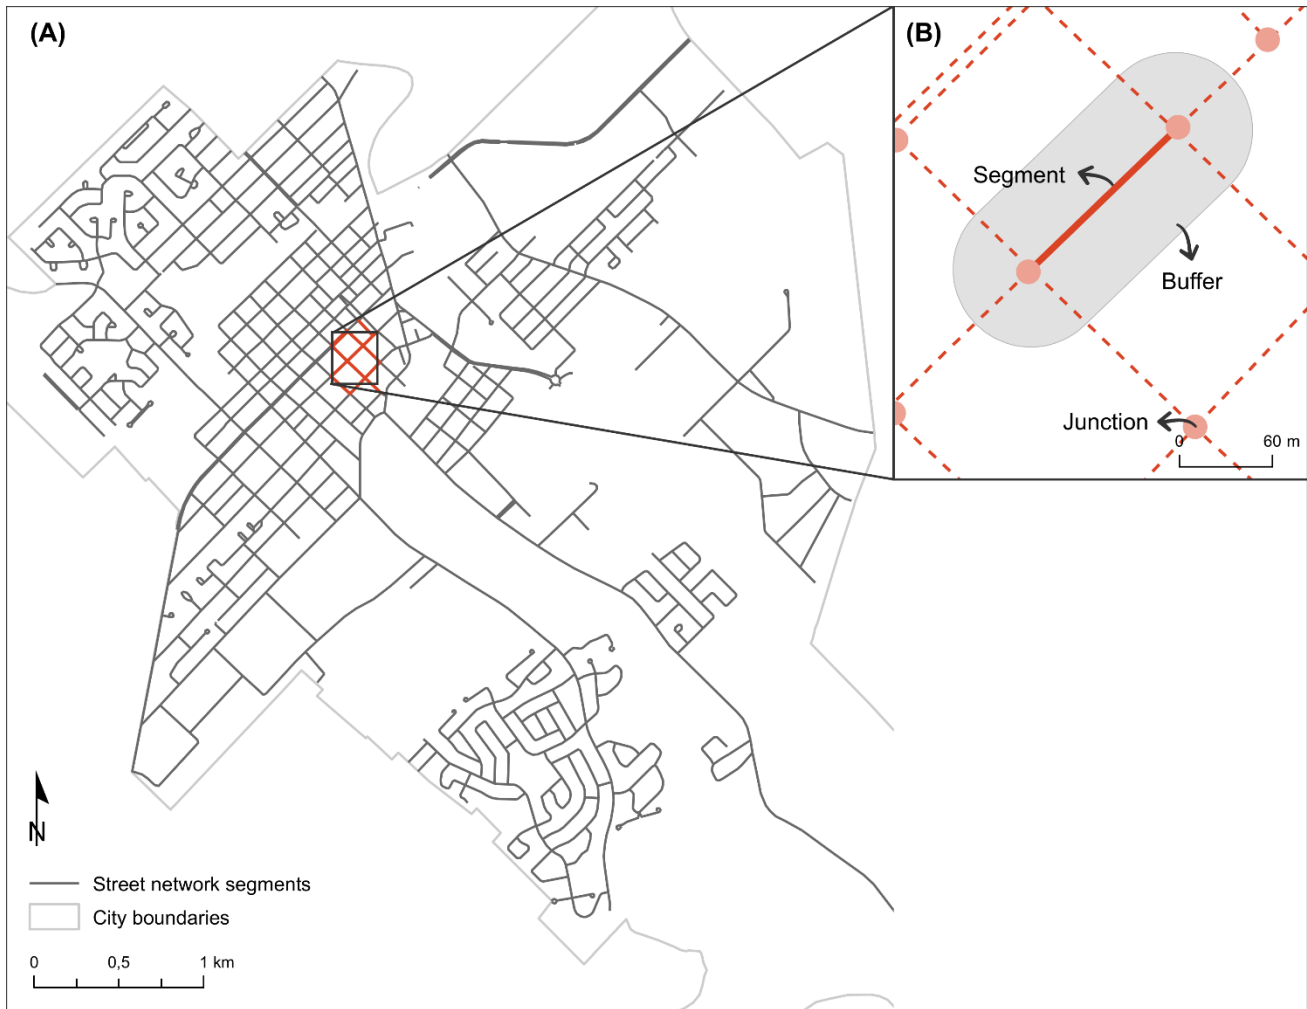

**Supplementary Figure 1.** The pattern of street segments (parts of streets between junctions) within the City of Joliette **(A)**. Inset shows schematic representation of a street segment within a 50-m buffer area used to aggregate spatial data per street segment **(B)**. There are 855 street segments in total in the study area and they range in length from 17 to 1057 m (mean: 154 m).

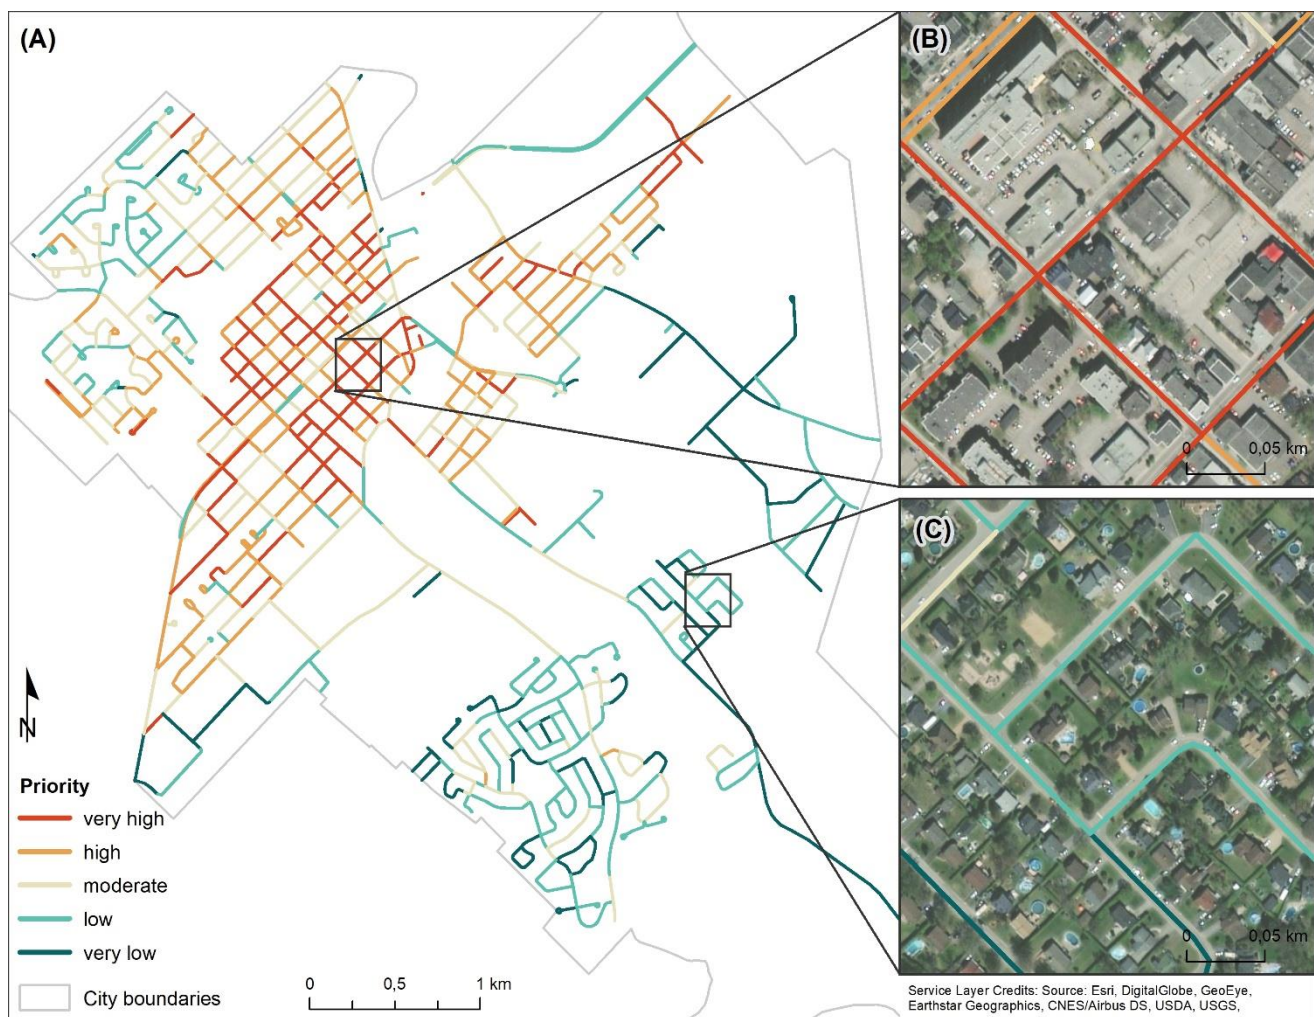

**Supplementary Figure 2.** Tree planting priority map for the City of Joliet with heat reduction as the main goal while also building both resilience and adaptive capacity through diversification. Map of the city's street segments network **(a)**, with insets showing high **(B)** and low priority areas **(C)** for tree planting on larger scale. Street segments shown in red have a higher priority for planting.
